# Supplementary material for: Bioinspired construction of multi-enzyme catalytic systems
Source: Royal Society of Chemistry journal article supplement (doi:10.1039/c7cs00914c), 2018-01-01
Supplement: c7cs00914c1.pdf [file c7cs00914c1.pdf]

*Supporting Information for Chem Soc Rev*

**Bioinspired Construction of Multi-Enzyme Catalytic Systems**

Jiafu Shi<sup>†,Δ</sup>, Yizhou Wu<sup>‡,Δ</sup>, Shaohua Zhang<sup>‡</sup>, Yu Tian<sup>†</sup>, Dong Yang<sup>‡</sup>, Zhongyi Jiang<sup>‡, §, \*</sup>

<sup>†</sup> Tianjin Engineering Center of Biomass-derived Gas and Oil, School of Environmental Science and Engineering, Tianjin University, Tianjin 300072, China

<sup>‡</sup> Key Laboratory for Green Chemical Technology of Ministry of Education, School of Chemical Engineering and Technology, Tianjin University, Tianjin 300072, China

<sup>§</sup> Collaborative Innovation Center of Chemical Science and Engineering (Tianjin), Tianjin

<sup>Δ</sup> JS and YW contributed equally to this work.

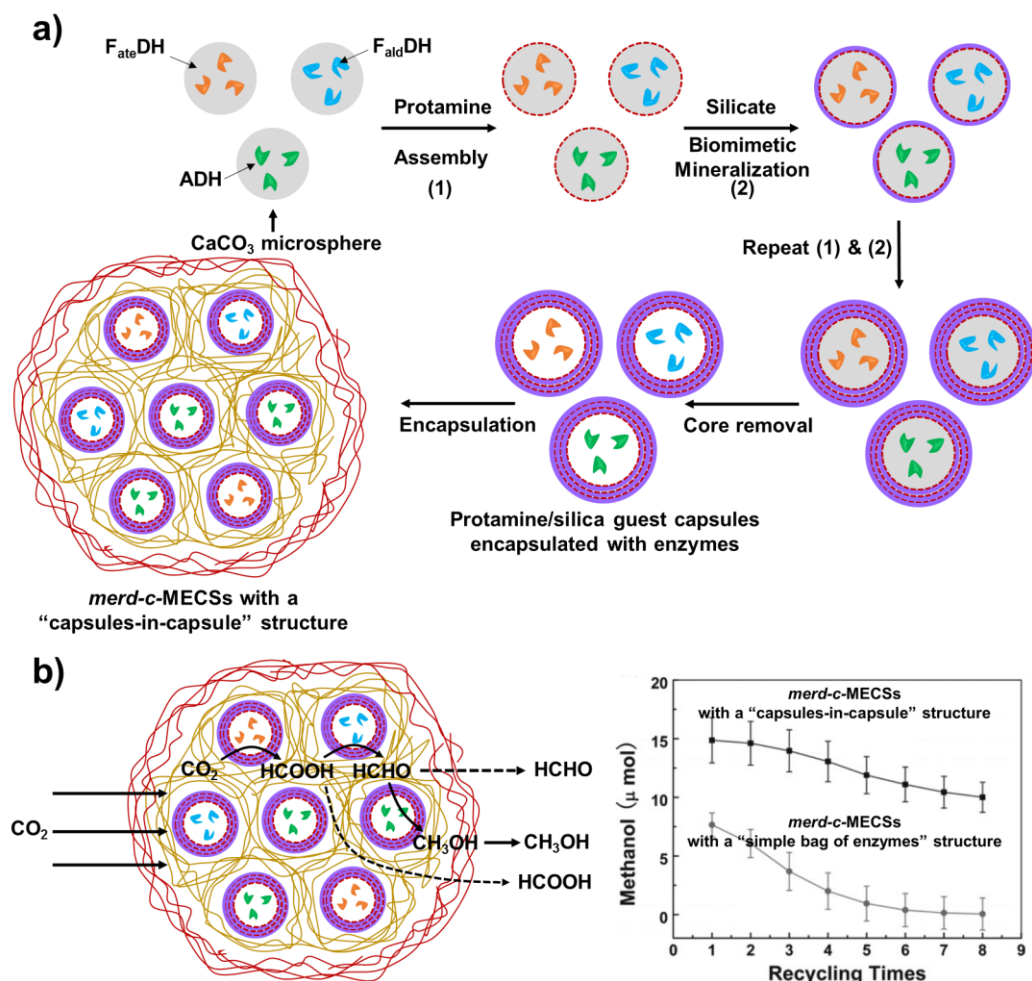

**Figure S1.** a) Construction of *merd-c-MECSs* through encapsulating protamine/silica guest capsules in the host capsule. Protamine/silica guest capsules were prepared through combining layer-by-layer assembly and biomimetic mineralization upon  $CaCO_3$  sacrificial templates.  $F_{ate}DH$ ,  $F_{ald}DH$  and ADH were individually encapsulated in the guest capsules. b)  $CO_2$  conversion enabled by *merd-c-MECSs* with a "capsules-in-capsule" structure.  $HCOOH$  and  $HCHO$  were the intermediates that may diffuse out of the *merd-c-MECSs*. c) Yield of methanol catalyzed by *merd-c-MECSs* with a "capsules-in-capsule" structure and a "simple bag of enzymes" structure. Reproduced with the permission from ref. 17. Copyright 2009 Royal Society of Chemistry.

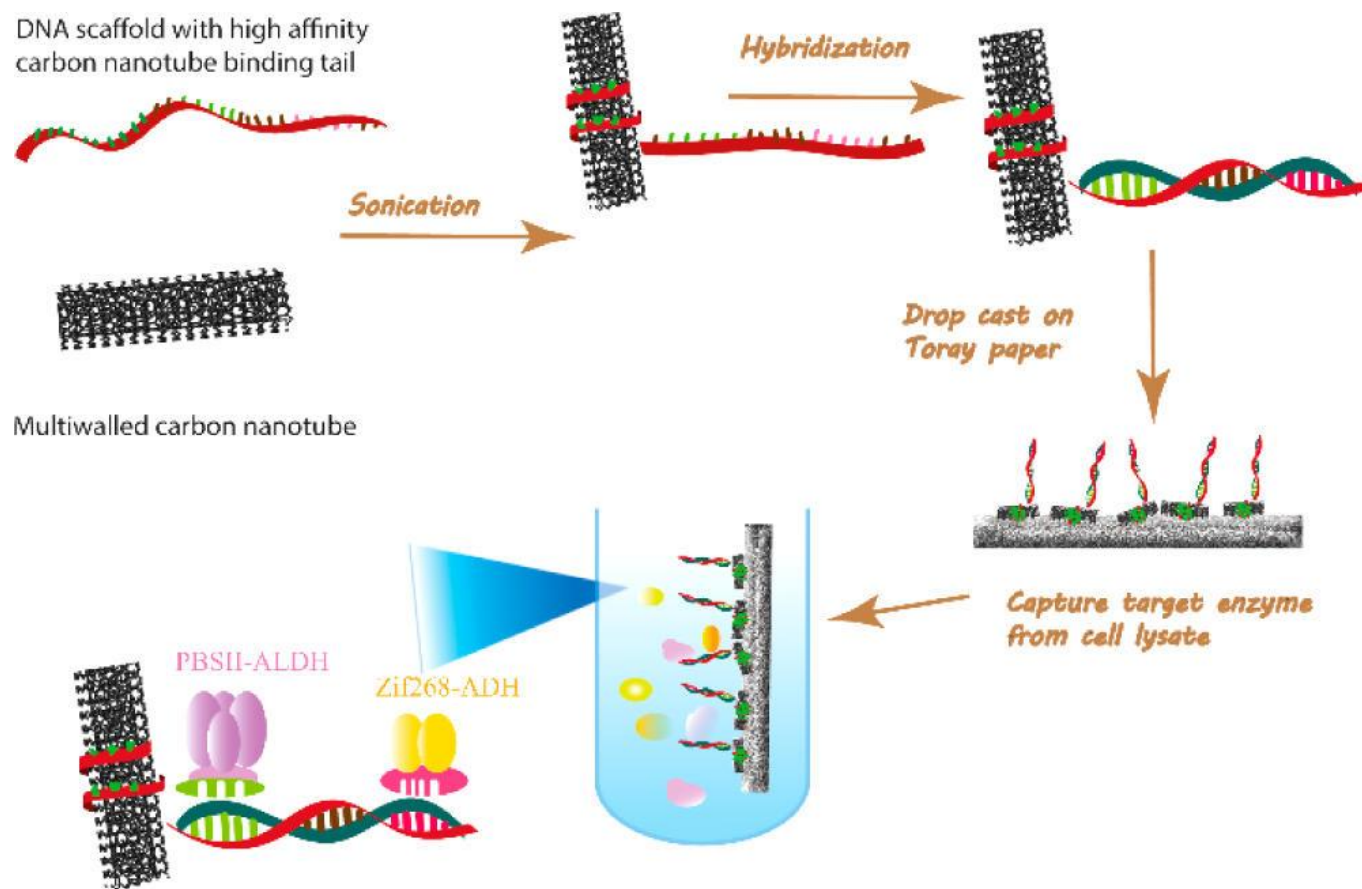

**Figure S2.** Construction of *mesp-s*-MECSs based on the adaptor-fused enzymes and DNA origami scaffolds for enzymatic methanol fuel cell. Reproduced with the permission from ref. 42. Copyright 2017 American Chemical Society.

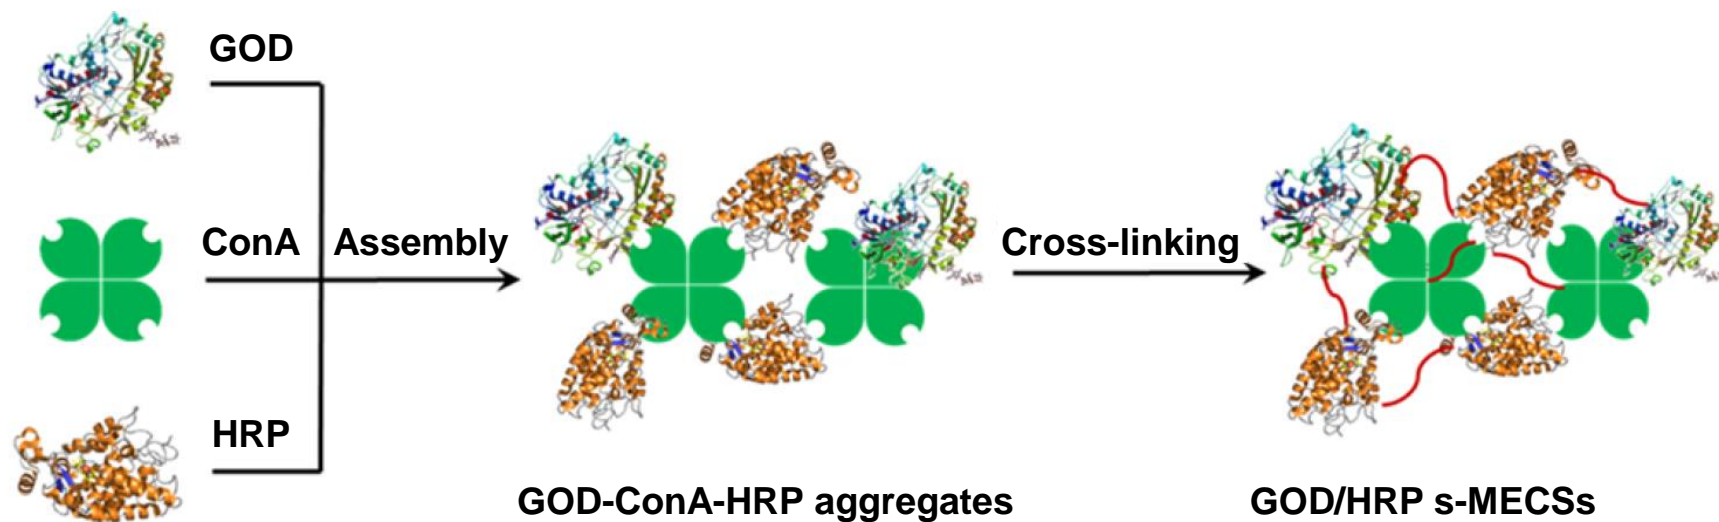

**Figure S3.** Construction of *mesp-s*-MECSs using ConA as agglutinant and glutaraldehyde as cross-linker. Reproduced with the permission from ref. 40. Copyright 2016 American Chemical Society.

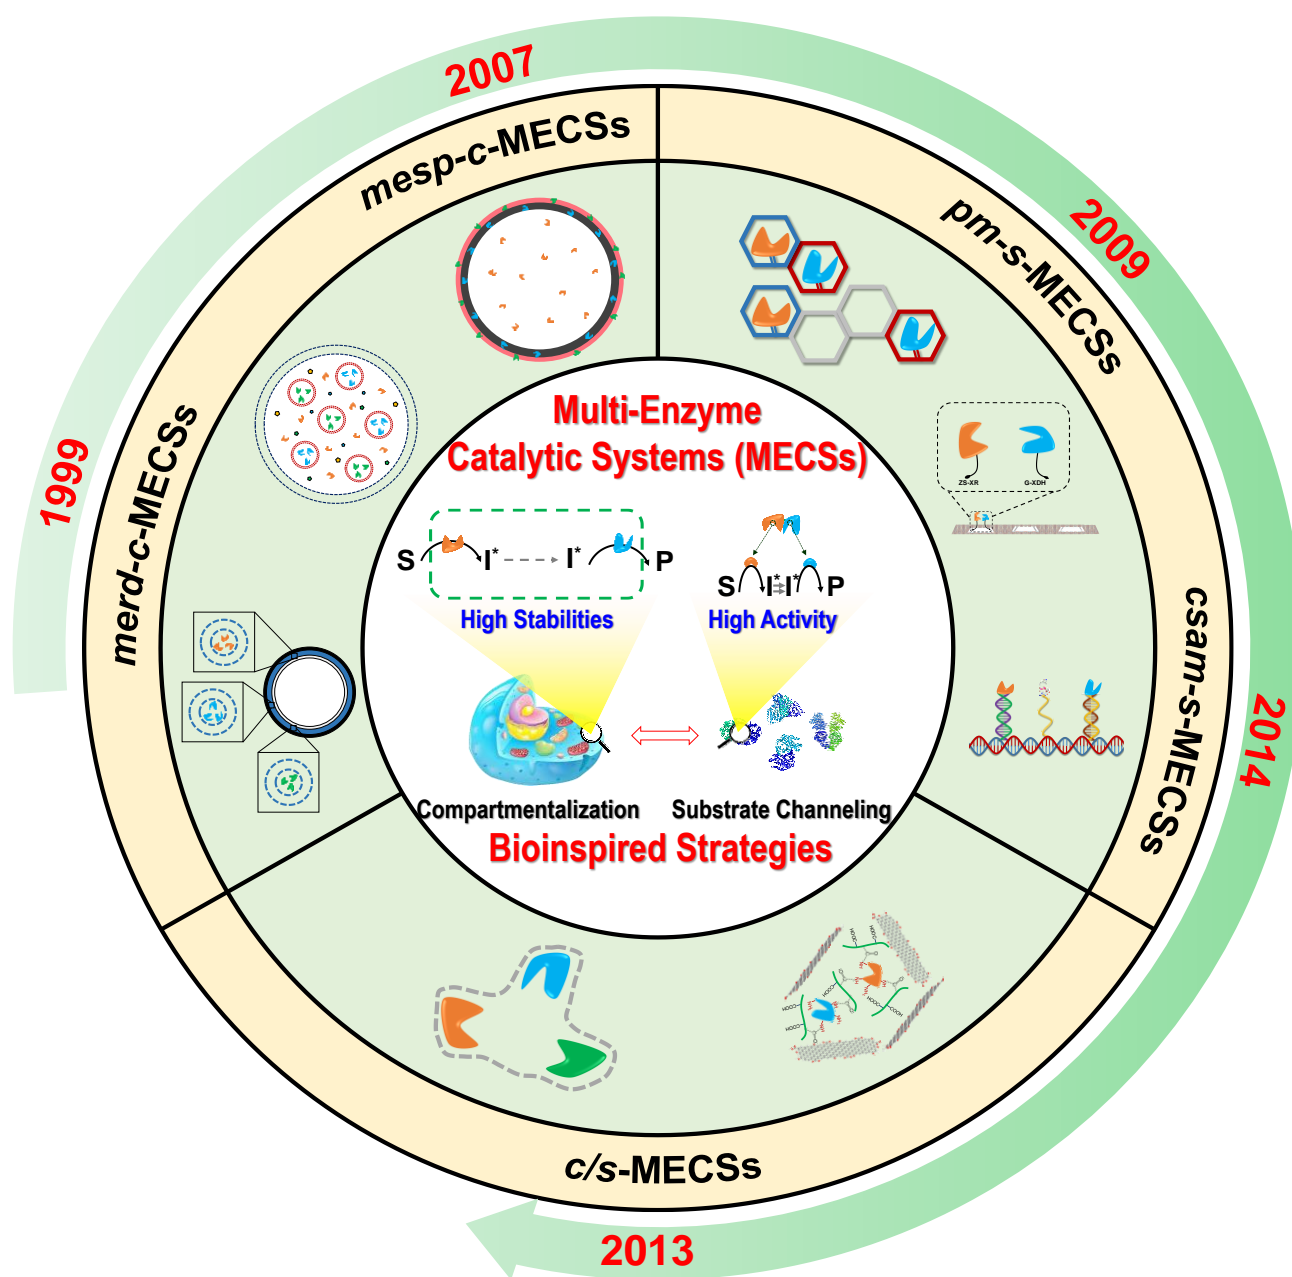

**Figure S4.** The content of this *tutorial review* with a timeline of the appearance of the various strategies: *merd-c-MECSs*, *mesp-c-MECSs*, *pm-c-MECSs*, *csam-s-MECSs*, *pm-c-MECSs* and *c/s-c-MECSs*. The appearance time of specific techniques related to the above strategies could be found in main text of the manuscript.

**Table S1.** Some examples of substrate channeling along with references.

| <b>Multi-enzymes</b>                         | <b>Channeling models</b> | <b>References</b> |
|----------------------------------------------|--------------------------|-------------------|
| Malate dehydrogenase-citrate synthase        | Electrostatic guidance   | R1                |
| Thymidylate synthase–dihydrofolate reductase | Electrostatic guidance   | R2                |
| Tryptophan synthase                          | Intramolecular tunnel    | R3                |
| Carbamoyl-phosphate synthase                 | Intramolecular tunnel    | R4                |
| Aldolase-dehydrogenases                      | Intramolecular tunnel    | R5                |
| Glutamine phosphoribosylpyrophosphate        | Intramolecular tunnel    | R6                |
| Fatty acid synthase                          | Chemical swing arms      | R7                |
| Polyketide synthases                         | Chemical swing arms      | R8                |
| Fatty acid $\beta$ -oxidation complexes      | Chemical swing arms      | R9                |
| Pyruvate dehydrogenase complex               | Chemical swing arms      | R10               |

## ***References***

- S1. F. Wu and S. Minter, *Angew. Chem. Int. Ed.*, 2015, **54**, 1851-1854.
- S2. C. E. Atreya, E. F. Johnson, J. Williamson, S. Y. Chang, P. H. Liang and K. S. Anderson, *J. Biol. Chem.*, 2003, **278**, 28901-28911.
- S3. E. W. Miles, *J. Biol. Chem.*, 2013, **288**, 10084-10091.
- S4. J. B. Thoden, F. M. Raushel, M. M. Benning, I. Rayment and H. M. Holden, *Acta Crystallogr. Sect. D-Biol. Crystallogr.*, 1999, **55**, 8-24.
- S5. J. Carere, S. E. McKenna, M. S. Kimber and S. Y. K. Seah, *Biochemistry*, 2013, **52**, 3502-3511.
- S6. X. S. Wang, A. E. Roitberg and N. G. J. Richards, *Biochemistry*, 2009, **48**, 12272-12282.
- S7. R. N. Perham, *Annu. Rev. Biochem.*, 2000, **69**, 961-1004.
- S8. S. Vance, O. Tkachenko, B. Thomas, M. Bassuni, H. Hong, D. Nietlispach and W. Broadhurst, *Biochem. J.*, 2016, **473**, 1097-1110.
- S9. M. Ishikawa, D. Tsuchiya, T. Oyama, Y. Tsunaka and K. Morikawa, *Embo J.*, 2004, **23**, 2745-2754.
- S10. D. D. Jones, K. M. Stott, M. J. Howard and R. N. Perham, *Biochemistry*, 2000, **39**, 8448-8459.
